# Supplementary material for: Comprehensive molecular characterization of inhibitors of apoptosis proteins (IAPs) for therapeutic targeting in cancer
Source: BMC Med Genomics. 2020 Jan 21;13:7. doi: 10.1186/s12920-020-0661-x (PMC6975060; doi:10.1186/s12920-020-0661-x)
Supplement: Supplementary file 6 — Additional file 6: Table S1. TCGA Data Summary and Cancer Acronyms. [file 12920_2020_661_MOESM6_ESM.xlsx]

## Sheet: Sheet1
Supplementary Table S1. TCGA Data Summary and Cancer Acronyms
Tumor Acronym	Tumor Full Name	Sample Size
ACC	Adrenocortical carcinoma	79
BLCA	Bladder Urothelial Carcinoma	408
BRCA	Breast invasive carcinoma	1093
CESC	Cervical squamous cell carcinoma and endocervical adenocarcinoma	304
CHOL	Cholangiocarcinoma	36
COAD	Colon adenocarcinoma	457
DLBC	Lymphoid Neoplasm Diffuse Large B-cell Lymphoma	48
ESCA	Esophageal carcinoma	184
GBM	Glioblastoma multiforme	153
HNSC	Head and Neck squamous cell carcinoma	520
KICH	Kidney Chromophobe	66
KIRC	Kidney renal clear cell carcinoma	533
KIRP	Kidney renal papillary cell carcinoma	290
LGG	Brain Lower Grade Glioma	516
LIHC	Liver hepatocellular carcinoma	371
LUAD	Lung adenocarcinoma	515
LUSC	Lung squamous cell carcinoma	501
MESO	Mesothelioma	87
OV	Ovarian serous cystadenocarcinoma	303
PAAD	Pancreatic adenocarcinoma	178
PCPG	Pheochromocytoma and Paraganglioma	179
PRAD	Prostate adenocarcinoma	497
READ	Rectum adenocarcinoma	166
SARC	Sarcoma	259
SKCM	Skin Cutaneous Melanoma	103
STAD	Stomach adenocarcinoma	415
TGCT	Testicular Germ Cell Tumors	150
THCA	Thyroid carcinoma	501
THYM	Thymoma	120
UCEC	Uterine Corpus Endometrial Carcinoma	545
UCS	Uterine Carcinosarcoma	57
UVM	Uveal Melanoma	80
