# Supplementary material for: Comprehensive molecular characterization of inhibitors of apoptosis proteins (IAPs) for therapeutic targeting in cancer
Source: BMC Med Genomics. 2020 Jan 21;13:7. doi: 10.1186/s12920-020-0661-x (PMC6975060; doi:10.1186/s12920-020-0661-x)
Supplement: Supplementary file 7 — Additional file 7: Table S2. BIRC5 Determines Sensitivity to IAP inhibition. [file 12920_2020_661_MOESM7_ESM.xlsx]

## Sheet: Sheet1
Supplementary Table S2. BIRC5 Determines Sensitivity to IAP inhibition
drug	tumor	correlation	p value	Target	Target Pathway
Obatoclax Mesylate	ALL	-0.544156	0.0107672	BCL2,BCL-XL,BCL-W,MCL1	Apoptosis regulation
rTRAIL	BRCA	-0.300524	0.0424239	TRAIL receptor agonist	Apoptosis regulation
Embelin	COAD/READ	0.375424	0.0201984	XIAP	Apoptosis regulation
Navitoclax	GBM	-0.459893	0.00708662	BCL2,BCL-XL,BCL-W	Apoptosis regulation
Obatoclax Mesylate	GBM	-0.408231	0.0251199	BCL2,BCL-XL,BCL-W,MCL1	Apoptosis regulation
Embelin	GBM	-0.371746	0.0430973	XIAP	Apoptosis regulation
TW 37	KIRC	0.394581	0.0341562	BCL2,BCL-XL,MCL1	Apoptosis regulation
rTRAIL	LAML	-0.405128	0.0400589	TRAIL receptor agonist	Apoptosis regulation
Embelin	LCML	0.783333	0.0125199	XIAP	Apoptosis regulation
XMD13-2	LGG	0.490196	0.04576	RIPK1	Apoptosis regulation
Obatoclax Mesylate	LIHC	-0.688725	0.0022327	BCL2,BCL-XL,BCL-W,MCL1	Apoptosis regulation
Navitoclax	LIHC	-0.538462	0.0469761	BCL2,BCL-XL,BCL-W	Apoptosis regulation
PAC-1	LIHC	-0.531863	0.0279876	Procaspase-3,Procaspase-7	Apoptosis regulation
Navitoclax	MESO	-0.564286	0.0284325	BCL2,BCL-XL,BCL-W	Apoptosis regulation
rTRAIL	MESO	-0.497744	0.0255326	TRAIL receptor agonist	Apoptosis regulation
rTRAIL	MM	-0.538235	0.0314932	TRAIL receptor agonist	Apoptosis regulation
Navitoclax	NB	-0.437876	0.0197822	BCL2,BCL-XL,BCL-W	Apoptosis regulation
rTRAIL	SKCM	0.278835	0.045314	TRAIL receptor agonist	Apoptosis regulation
