# Supplementary material for: Comprehensive molecular characterization of inhibitors of apoptosis proteins (IAPs) for therapeutic targeting in cancer
Source: BMC Med Genomics. 2020 Jan 21;13:7. doi: 10.1186/s12920-020-0661-x (PMC6975060; doi:10.1186/s12920-020-0661-x)
Supplement: Supplementary file 8 — Additional file 8: Table S3. Apoptosis pathway genes. [file 12920_2020_661_MOESM8_ESM.xlsx]

## Sheet: Table S3
Pathway	Genes
Extrinsic Pathway for Apoptosis	DCC
Extrinsic Pathway for Apoptosis	APPL1
Extrinsic Pathway for Apoptosis	CASP3
Extrinsic Pathway for Apoptosis	UNC5B
Extrinsic Pathway for Apoptosis	UNC5A
Extrinsic Pathway for Apoptosis	MAGED1
Extrinsic Pathway for Apoptosis	CASP8
Extrinsic Pathway for Apoptosis	RIPK1
Extrinsic Pathway for Apoptosis	FADD
Extrinsic Pathway for Apoptosis	CFLAR
Extrinsic Pathway for Apoptosis	CASP9
Extrinsic Pathway for Apoptosis	DAPK1
Extrinsic Pathway for Apoptosis	TRAF2
Extrinsic Pathway for Apoptosis	TRADD
Extrinsic Pathway for Apoptosis	TICAM1
Extrinsic Pathway for Apoptosis	FASLG
Extrinsic Pathway for Apoptosis	FAS
Extrinsic Pathway for Apoptosis	TNFSF10
Extrinsic Pathway for Apoptosis	TICAM2
Extrinsic Pathway for Apoptosis	TLR3
Extrinsic Pathway for Apoptosis	TNFRSF10A
Extrinsic Pathway for Apoptosis	TNFRSF10B
Extrinsic Pathway for Apoptosis	CD14
Extrinsic Pathway for Apoptosis	LY96
Extrinsic Pathway for Apoptosis	TLR4
Intrinsic Pathway for Apoptosis	BID
Intrinsic Pathway for Apoptosis	BCL2
Intrinsic Pathway for Apoptosis	BCL2L1
Intrinsic Pathway for Apoptosis	BAX
Intrinsic Pathway for Apoptosis	BAK1
Intrinsic Pathway for Apoptosis	CYCS
Intrinsic Pathway for Apoptosis	DIABLO
Intrinsic Pathway for Apoptosis	GZMB
Intrinsic Pathway for Apoptosis	NMT1
Intrinsic Pathway for Apoptosis	BAD
Intrinsic Pathway for Apoptosis	PMAIP1
Intrinsic Pathway for Apoptosis	BBC3
Intrinsic Pathway for Apoptosis	BCL2L11
Intrinsic Pathway for Apoptosis	BMF
Intrinsic Pathway for Apoptosis	TP53
Intrinsic Pathway for Apoptosis	TFDP1
Intrinsic Pathway for Apoptosis	E2F1
Intrinsic Pathway for Apoptosis	DYNLL1
Intrinsic Pathway for Apoptosis	MAPK8
Intrinsic Pathway for Apoptosis	DYNLL2
Intrinsic Pathway for Apoptosis	APAF1
Intrinsic Pathway for Apoptosis	CASP9
Intrinsic Pathway for Apoptosis	CASP3
Intrinsic Pathway for Apoptosis	CASP7
Intrinsic Pathway for Apoptosis	CASP8
Intrinsic Pathway for Apoptosis	AKT1
Intrinsic Pathway for Apoptosis	YWHAH
Intrinsic Pathway for Apoptosis	YWHAG
Intrinsic Pathway for Apoptosis	SFN
Intrinsic Pathway for Apoptosis	YWHAQ
Intrinsic Pathway for Apoptosis	YWHAZ
Intrinsic Pathway for Apoptosis	YWHAB
Intrinsic Pathway for Apoptosis	YWHAE
Intrinsic Pathway for Apoptosis	PPP3R1
Intrinsic Pathway for Apoptosis	PPP3CC
Intrinsic Pathway for Apoptosis	XIAP
Execution phase of Apoptosis	DNM1L
Execution phase of Apoptosis	STK24
Execution phase of Apoptosis	APC
Execution phase of Apoptosis	BIRC2
Execution phase of Apoptosis	PTK2
Execution phase of Apoptosis	PRKCD
Execution phase of Apoptosis	PRKCQ
Execution phase of Apoptosis	ACIN1
Execution phase of Apoptosis	ROCK1
Execution phase of Apoptosis	FNTA
Execution phase of Apoptosis	BCAP31
Execution phase of Apoptosis	BMX
Execution phase of Apoptosis	STK26
Execution phase of Apoptosis	CLSPN
Execution phase of Apoptosis	SATB1
Execution phase of Apoptosis	PAK2
Execution phase of Apoptosis	ADD1
Execution phase of Apoptosis	SPTAN1
Execution phase of Apoptosis	GAS2
Execution phase of Apoptosis	DBNL
Execution phase of Apoptosis	VIM
Execution phase of Apoptosis	GSN
Execution phase of Apoptosis	PLEC
Execution phase of Apoptosis	MAPT
Execution phase of Apoptosis	CDH1
Execution phase of Apoptosis	CTNNB1
Execution phase of Apoptosis	DSG3
Execution phase of Apoptosis	DSG2
Execution phase of Apoptosis	DSG1
Execution phase of Apoptosis	DSP
Execution phase of Apoptosis	PKP1
Execution phase of Apoptosis	TJP1
Execution phase of Apoptosis	TJP2
Execution phase of Apoptosis	OCLN
Execution phase of Apoptosis	LMNA
Execution phase of Apoptosis	LMNB1
Execution phase of Apoptosis	DFFA
Execution phase of Apoptosis	DFFB
Execution phase of Apoptosis	CASP8
Execution phase of Apoptosis	CASP7
Execution phase of Apoptosis	CASP6
Execution phase of Apoptosis	KPNA1
Execution phase of Apoptosis	KPNB1
Execution phase of Apoptosis	CASP3
Execution phase of Apoptosis	HMGB1
Execution phase of Apoptosis	HMGB2
Execution phase of Apoptosis	H1F0
