# Supplementary material for: Comprehensive molecular characterization of inhibitors of apoptosis proteins (IAPs) for therapeutic targeting in cancer
Source: BMC Med Genomics. 2020 Jan 21;13:7. doi: 10.1186/s12920-020-0661-x (PMC6975060; doi:10.1186/s12920-020-0661-x)
Supplement: Supplementary file 9 — Additional file 9: Table S4. Sample size for TCGA tumor vs adjacent normal comparisons. [file 12920_2020_661_MOESM9_ESM.xlsx]

## Sheet: Table S4
	Normal	Tumor
ACC	0	79
BLCA	19	408
BRCA	114	1097
CESC	3	305
CHOL	9	36
COAD	41	449
DLBC	0	48
ESCA	11	184
GBM	5	153
HNSC	44	520
KICH	25	66
KIRC	72	533
KIRP	32	290
LGG	0	515
LIHC	50	371
LUAD	59	515
LUSC	51	501
MESO	0	87
OV	0	304
PAAD	4	178
PCPG	3	179
PRAD	52	497
READ	10	160
SARC	2	259
SKCM	0	103
STAD	35	415
TGCT	0	134
THCA	59	505
THYM	2	120
UCEC	34	532
UCS	0	57
UVM	0	80
