# Supplementary material for: Comprehensive molecular characterization of inhibitors of apoptosis proteins (IAPs) for therapeutic targeting in cancer
Source: BMC Med Genomics. 2020 Jan 21;13:7. doi: 10.1186/s12920-020-0661-x (PMC6975060; doi:10.1186/s12920-020-0661-x)
Supplement: Supplementary file 10 — Additional file 10: Table S5. Results of TCGA tumor vs adjacent normal comparisons. [file 12920_2020_661_MOESM10_ESM.xlsx]

## Sheet: Table S5
IAPs	Cancer	FC	pValue
NAIP	BLCA	-1.10532	0.584669
BIRC2	BLCA	1.05235	0.652253
BIRC3	BLCA	-2.2436	0.00694976
XIAP	BLCA	-1.00373	0.970691
BIRC5	BLCA	13.3235	1.25502e-30
BIRC6	BLCA	-1.17022	0.107467
BIRC7	BLCA	1.63272	0.0737569
NAIP	BRCA	-1.1176	0.136729
BIRC2	BRCA	-1.26931	3.02189e-11
BIRC3	BRCA	-1.2773	0.0116504
XIAP	BRCA	-1.02972	0.392193
BIRC5	BRCA	13.8958	1.25292e-113
BIRC6	BRCA	-1.19228	0.000135232
BIRC7	BRCA	1.48855	2.26924e-05
NAIP	CESC	1.4285	0.417408
BIRC2	CESC	-1.03251	0.944002
BIRC3	CESC	1.14277	0.854712
XIAP	CESC	1.18213	0.437738
BIRC5	CESC	64.3398	1.28204e-29
BIRC6	CESC	1.23279	0.372252
BIRC7	CESC	1.12546	0.877431
NAIP	CHOL	2.58943	0.000403625
BIRC2	CHOL	-1.16766	0.201261
BIRC3	CHOL	3.59679	0.000434449
XIAP	CHOL	1.07538	0.463442
BIRC5	CHOL	20.4155	5.92794e-12
BIRC6	CHOL	-1.06999	0.632738
BIRC7	CHOL	4.3848	0.00244195
NAIP	COAD	-1.78673	1.51019e-07
BIRC2	COAD	-1.29535	0.00101865
BIRC3	COAD	-1.94404	2.46373e-06
XIAP	COAD	-1.09533	0.113453
BIRC5	COAD	3.15304	9.78616e-30
BIRC6	COAD	-1.19707	0.00206527
BIRC7	COAD	2.75438	5.58783e-08
NAIP	ESCA	-1.13847	0.548638
BIRC2	ESCA	1.12689	0.279335
BIRC3	ESCA	-1.30634	0.500977
XIAP	ESCA	1.15685	0.223543
BIRC5	ESCA	13.5693	1.97409e-26
BIRC6	ESCA	-1.12091	0.272832
BIRC7	ESCA	2.63534	0.0126971
NAIP	GBM	2.02177	0.0101601
BIRC2	GBM	1.48869	0.00173126
BIRC3	GBM	1.23985	0.693219
XIAP	GBM	-1.29125	0.0068958
BIRC5	GBM	116.895	3.27026e-26
BIRC6	GBM	-1.65207	0.00229696
BIRC7	GBM	1.8377	0.212059
NAIP	HNSC	1.1297	0.344374
BIRC2	HNSC	1.15021	0.14696
BIRC3	HNSC	1.17956	0.31866
XIAP	HNSC	-1.01039	0.851246
BIRC5	HNSC	4.50389	1.21199e-43
BIRC6	HNSC	-1.08895	0.264071
BIRC7	HNSC	1.23437	0.166207
NAIP	KICH	-1.28491	0.0644044
BIRC2	KICH	-1.41687	2.1216e-06
BIRC3	KICH	-4.02073	8.23103e-10
XIAP	KICH	1.18334	0.000668174
BIRC5	KICH	2.88681	0.000116942
BIRC6	KICH	-1.20718	0.043827
BIRC7	KICH	4.52286	5.81567e-05
NAIP	KIRC	2.12817	6.93573e-16
BIRC2	KIRC	1.07651	0.0348381
BIRC3	KIRC	4.48164	3.49964e-37
XIAP	KIRC	-1.39487	5.97852e-26
BIRC5	KIRC	7.42261	1.27192e-55
BIRC6	KIRC	-1.28265	1.57469e-07
BIRC7	KIRC	24.2222	2.88268e-33
NAIP	KIRP	1.13663	0.359267
BIRC2	KIRP	-1.17004	0.00325475
BIRC3	KIRP	1.79481	0.001762
XIAP	KIRP	-1.41971	9.84457e-09
BIRC5	KIRP	6.94617	7.26033e-18
BIRC6	KIRP	-1.40389	5.68254e-05
BIRC7	KIRP	10.9828	1.09071e-11
NAIP	LIHC	1.28087	0.067145
BIRC2	LIHC	-1.22158	5.07382e-05
BIRC3	LIHC	1.30482	0.127049
XIAP	LIHC	-1.08773	0.166026
BIRC5	LIHC	19.7497	7.96304e-48
BIRC6	LIHC	-1.20657	0.00550951
BIRC7	LIHC	1.3926	0.0712584
NAIP	LUAD	-1.32073	0.00194512
BIRC2	LUAD	-1.05801	0.226288
BIRC3	LUAD	1.03061	0.80921
XIAP	LUAD	1.17072	9.83836e-05
BIRC5	LUAD	14.0117	9.22989e-60
BIRC6	LUAD	1.12594	0.0177698
BIRC7	LUAD	1.3073	0.101635
NAIP	LUSC	-2.20011	7.35334e-13
BIRC2	LUSC	-1.04601	0.457701
BIRC3	LUSC	-2.91183	5.3756e-13
XIAP	LUSC	-1.13042	0.00266228
BIRC5	LUSC	39.0105	4.5997e-155
BIRC6	LUSC	1.09443	0.08057
BIRC7	LUSC	-1.75697	0.000528415
NAIP	PAAD	-1.92366	0.0592055
BIRC2	PAAD	-1.09798	0.485148
BIRC3	PAAD	-1.57283	0.357443
XIAP	PAAD	1.09636	0.486602
BIRC5	PAAD	1.85131	0.178384
BIRC6	PAAD	-1.1561	0.456938
BIRC7	PAAD	1.13103	0.868128
NAIP	PCPG	2.14427	0.0346283
BIRC2	PCPG	-1.69217	0.00206077
BIRC3	PCPG	1.16287	0.742402
XIAP	PCPG	1.07912	0.515137
BIRC5	PCPG	7.65217	0.000506609
BIRC6	PCPG	-1.01416	0.946898
BIRC7	PCPG	-1.75395	0.37943
NAIP	PRAD	1.22504	0.0402114
BIRC2	PRAD	-1.04444	0.247541
BIRC3	PRAD	-1.27093	0.0223337
XIAP	PRAD	-1.04448	0.265432
BIRC5	PRAD	4.19929	3.03757e-24
BIRC6	PRAD	-1.08595	0.155441
BIRC7	PRAD	1.81955	6.49474e-08
NAIP	READ	-1.60126	0.0283415
BIRC2	READ	-1.45622	0.0113871
BIRC3	READ	-1.87617	0.00383042
XIAP	READ	-1.05958	0.649208
BIRC5	READ	2.71164	8.12618e-07
BIRC6	READ	-1.20385	0.145109
BIRC7	READ	2.66522	0.0100231
NAIP	SARC	3.24746	0.0132115
BIRC2	SARC	1.21796	0.619852
BIRC3	SARC	-1.46292	0.688873
XIAP	SARC	1.26217	0.374434
BIRC5	SARC	12.4794	0.000397511
BIRC6	SARC	1.26253	0.491116
BIRC7	SARC	1.32606	0.798632
NAIP	STAD	1.17248	0.240384
BIRC2	STAD	1.22641	0.000182407
BIRC3	STAD	1.16903	0.333342
XIAP	STAD	1.21504	0.00309969
BIRC5	STAD	5.73244	1.34316e-26
BIRC6	STAD	1.25685	0.000613033
BIRC7	STAD	4.83969	3.69362e-11
NAIP	THCA	-2.20589	4.50574e-14
BIRC2	THCA	-1.05906	0.0923933
BIRC3	THCA	-1.21667	0.256259
XIAP	THCA	1.01074	0.734719
BIRC5	THCA	2.23625	3.07976e-09
BIRC6	THCA	-1.32144	4.80699e-08
BIRC7	THCA	11.4797	6.17138e-21
NAIP	THYM	-2.15636	0.152042
BIRC2	THYM	-1.25555	0.319555
BIRC3	THYM	-1.30602	0.654271
XIAP	THYM	-1.23937	0.469218
BIRC5	THYM	1.21289	0.851229
BIRC6	THYM	-1.6673	0.148776
BIRC7	THYM	2.35519	0.243052
NAIP	UCEC	-1.1443	0.343596
BIRC2	UCEC	-1.15906	0.0326291
BIRC3	UCEC	-1.1609	0.44909
XIAP	UCEC	-1.00068	0.992249
BIRC5	UCEC	33.563	9.88636e-83
BIRC6	UCEC	-1.11075	0.16743
BIRC7	UCEC	2.74603	2.29246e-05
