# Supplementary material for: Comprehensive molecular characterization of inhibitors of apoptosis proteins (IAPs) for therapeutic targeting in cancer
Source: BMC Med Genomics. 2020 Jan 21;13:7. doi: 10.1186/s12920-020-0661-x (PMC6975060; doi:10.1186/s12920-020-0661-x)
Supplement: Supplementary file 11 — Additional file 11: Table S6. Results of Sensitivity analysis for Apoptosis inhibitors. [file 12920_2020_661_MOESM11_ESM.xlsx]

## Sheet: Table S6
drug	cancer	corr	pval	IAP	Target	TargetPathway	drug_cancer	Target2
XMD13-2	ALL	0.557312	0.00704781	BIRC2	RIPK1	Apoptosis regulation	XMD13-2 | ALL | BIRC2	RIPK1
XMD13-2	BRCA	-0.354425	0.0156619	BIRC2	RIPK1	Apoptosis regulation	XMD13-2 | BRCA | BIRC2	RIPK1
Sepantronium bromide	COAD/READ	-0.532543	0.000166112	BIRC2	BIRC5	Apoptosis regulation	Sepantronium bromide | COAD/READ | BIRC2	BIRC5
PAC-1	GBM	-0.539683	0.00303666	BIRC2	Procaspase-3,Procaspase-7	Apoptosis regulation	PAC-1 | GBM | BIRC2	Procaspase
rTRAIL	LAML	0.500855	0.00915492	BIRC2	TRAIL receptor agonist	Apoptosis regulation	rTRAIL | LAML | BIRC2	TRAIL
Navitoclax	LIHC	0.652747	0.0113846	BIRC2	BCL2,BCL-XL,BCL-W	Apoptosis regulation	Navitoclax | LIHC | BIRC2	BCL-2
PAC-1	LUSC	0.613187	0.0197063	BIRC2	Procaspase-3,Procaspase-7	Apoptosis regulation	PAC-1 | LUSC | BIRC2	Procaspase
XMD13-2	LUSC	0.551648	0.040849	BIRC2	RIPK1	Apoptosis regulation	XMD13-2 | LUSC | BIRC2	RIPK1
rTRAIL	MM	0.55	0.027294	BIRC2	TRAIL receptor agonist	Apoptosis regulation	rTRAIL | MM | BIRC2	TRAIL
rTRAIL	NB	-0.413043	0.0448492	BIRC2	TRAIL receptor agonist	Apoptosis regulation	rTRAIL | NB | BIRC2	TRAIL
Sepantronium bromide	OV	-0.423645	0.0246717	BIRC2	BIRC5	Apoptosis regulation	Sepantronium bromide | OV | BIRC2	BIRC5
Navitoclax	CESC	-0.565934	0.0437926	BIRC3	BCL2,BCL-XL,BCL-W	Apoptosis regulation	Navitoclax | CESC | BIRC3	BCL-2
rTRAIL	COAD/READ	0.328854	0.0274057	BIRC3	TRAIL receptor agonist	Apoptosis regulation	rTRAIL | COAD/READ | BIRC3	TRAIL
rTRAIL	ESCA	-0.470588	0.00571327	BIRC3	TRAIL receptor agonist	Apoptosis regulation	rTRAIL | ESCA | BIRC3	TRAIL
PAC-1	KIRC	-0.428854	0.0411623	BIRC3	Procaspase-3,Procaspase-7	Apoptosis regulation	PAC-1 | KIRC | BIRC3	Procaspase
TW 37	KIRC	-0.433005	0.0189622	BIRC3	BCL2,BCL-XL,MCL1	Apoptosis regulation	TW 37 | KIRC | BIRC3	BCL-2
rTRAIL	MM	0.529412	0.034952	BIRC3	TRAIL receptor agonist	Apoptosis regulation	rTRAIL | MM | BIRC3	TRAIL
rTRAIL	NB	0.447826	0.0282015	BIRC3	TRAIL receptor agonist	Apoptosis regulation	rTRAIL | NB | BIRC3	TRAIL
Navitoclax	SCLC	0.293469	0.0407014	BIRC3	BCL2,BCL-XL,BCL-W	Apoptosis regulation	Navitoclax | SCLC | BIRC3	BCL-2
rTRAIL	SKCM	-0.288739	0.0378981	BIRC3	TRAIL receptor agonist	Apoptosis regulation	rTRAIL | SKCM | BIRC3	TRAIL
Sepantronium bromide	THCA	0.592857	0.0198464	BIRC3	BIRC5	Apoptosis regulation	Sepantronium bromide | THCA | BIRC3	BIRC5
Navitoclax	ALL	0.41913	0.0414837	XIAP	BCL2,BCL-XL,BCL-W	Apoptosis regulation	Navitoclax | ALL | XIAP	BCL-2
Embelin	BLCA	0.750877	0.000211665	XIAP	XIAP	Apoptosis regulation	Embelin | BLCA | XIAP	XIAP
Obatoclax Mesylate	BLCA	0.515789	0.0237918	XIAP	BCL2,BCL-XL,BCL-W,MCL1	Apoptosis regulation	Obatoclax Mesylate | BLCA | XIAP	BCL-2
Sepantronium bromide	ESCA	0.353944	0.0433005	XIAP	BIRC5	Apoptosis regulation	Sepantronium bromide | ESCA | XIAP	BIRC5
Obatoclax Mesylate	GBM	0.464294	0.0097476	XIAP	BCL2,BCL-XL,BCL-W,MCL1	Apoptosis regulation	Obatoclax Mesylate | GBM | XIAP	BCL-2
Sepantronium bromide	KIRC	-0.475096	0.0106231	XIAP	BIRC5	Apoptosis regulation	Sepantronium bromide | KIRC | XIAP	BIRC5
Obatoclax Mesylate	LIHC	0.52451	0.030654	XIAP	BCL2,BCL-XL,BCL-W,MCL1	Apoptosis regulation	Obatoclax Mesylate | LIHC | XIAP	BCL-2
XMD13-2	LUAD	-0.265463	0.0403695	XIAP	RIPK1	Apoptosis regulation	XMD13-2 | LUAD | XIAP	RIPK1
Obatoclax Mesylate	LUSC	0.683517	0.00703674	XIAP	BCL2,BCL-XL,BCL-W,MCL1	Apoptosis regulation	Obatoclax Mesylate | LUSC | XIAP	BCL-2
Sepantronium bromide	NB	-0.414888	0.0281412	XIAP	BIRC5	Apoptosis regulation	Sepantronium bromide | NB | XIAP	BIRC5
Sepantronium bromide	OV	-0.405583	0.0322504	XIAP	BIRC5	Apoptosis regulation	Sepantronium bromide | OV | XIAP	BIRC5
Obatoclax Mesylate	SKCM	0.290408	0.042946	XIAP	BCL2,BCL-XL,BCL-W,MCL1	Apoptosis regulation	Obatoclax Mesylate | SKCM | XIAP	BCL-2
XMD13-2	THCA	0.653571	0.00823037	XIAP	RIPK1	Apoptosis regulation	XMD13-2 | THCA | XIAP	RIPK1
Obatoclax Mesylate	ALL	-0.544156	0.0107672	BIRC5	BCL2,BCL-XL,BCL-W,MCL1	Apoptosis regulation	Obatoclax Mesylate | ALL | BIRC5	BCL-2
rTRAIL	BRCA	-0.300524	0.0424239	BIRC5	TRAIL receptor agonist	Apoptosis regulation	rTRAIL | BRCA | BIRC5	TRAIL
Embelin	COAD/READ	0.375424	0.0201984	BIRC5	XIAP	Apoptosis regulation	Embelin | COAD/READ | BIRC5	XIAP
Embelin	GBM	-0.371746	0.0430973	BIRC5	XIAP	Apoptosis regulation	Embelin | GBM | BIRC5	XIAP
Navitoclax	GBM	-0.459893	0.00708662	BIRC5	BCL2,BCL-XL,BCL-W	Apoptosis regulation	Navitoclax | GBM | BIRC5	BCL-2
Obatoclax Mesylate	GBM	-0.408231	0.0251199	BIRC5	BCL2,BCL-XL,BCL-W,MCL1	Apoptosis regulation	Obatoclax Mesylate | GBM | BIRC5	BCL-2
TW 37	KIRC	0.394581	0.0341562	BIRC5	BCL2,BCL-XL,MCL1	Apoptosis regulation	TW 37 | KIRC | BIRC5	BCL-2
rTRAIL	LAML	-0.405128	0.0400589	BIRC5	TRAIL receptor agonist	Apoptosis regulation	rTRAIL | LAML | BIRC5	TRAIL
Embelin	LCML	0.783333	0.0125199	BIRC5	XIAP	Apoptosis regulation	Embelin | LCML | BIRC5	XIAP
XMD13-2	LGG	0.490196	0.04576	BIRC5	RIPK1	Apoptosis regulation	XMD13-2 | LGG | BIRC5	RIPK1
Navitoclax	LIHC	-0.538462	0.0469761	BIRC5	BCL2,BCL-XL,BCL-W	Apoptosis regulation	Navitoclax | LIHC | BIRC5	BCL-2
Obatoclax Mesylate	LIHC	-0.688725	0.0022327	BIRC5	BCL2,BCL-XL,BCL-W,MCL1	Apoptosis regulation	Obatoclax Mesylate | LIHC | BIRC5	BCL-2
PAC-1	LIHC	-0.531863	0.0279876	BIRC5	Procaspase-3,Procaspase-7	Apoptosis regulation	PAC-1 | LIHC | BIRC5	Procaspase
Navitoclax	MESO	-0.564286	0.0284325	BIRC5	BCL2,BCL-XL,BCL-W	Apoptosis regulation	Navitoclax | MESO | BIRC5	BCL-2
rTRAIL	MESO	-0.497744	0.0255326	BIRC5	TRAIL receptor agonist	Apoptosis regulation	rTRAIL | MESO | BIRC5	TRAIL
rTRAIL	MM	-0.538235	0.0314932	BIRC5	TRAIL receptor agonist	Apoptosis regulation	rTRAIL | MM | BIRC5	TRAIL
Navitoclax	NB	-0.437876	0.0197822	BIRC5	BCL2,BCL-XL,BCL-W	Apoptosis regulation	Navitoclax | NB | BIRC5	BCL-2
rTRAIL	SKCM	0.278835	0.045314	BIRC5	TRAIL receptor agonist	Apoptosis regulation	rTRAIL | SKCM | BIRC5	TRAIL
Embelin	BRCA	-0.31383	0.0317001	BIRC6	XIAP	Apoptosis regulation	Embelin | BRCA | BIRC6	XIAP
TW 37	BRCA	-0.416741	0.00604337	BIRC6	BCL2,BCL-XL,MCL1	Apoptosis regulation	TW 37 | BRCA | BIRC6	BCL-2
Embelin	CESC	-0.67033	0.0121662	BIRC6	XIAP	Apoptosis regulation	Embelin | CESC | BIRC6	XIAP
Navitoclax	DLBC	-0.451613	0.0107634	BIRC6	BCL2,BCL-XL,BCL-W	Apoptosis regulation	Navitoclax | DLBC | BIRC6	BCL-2
Embelin	ESCA	0.396215	0.0407592	BIRC6	XIAP	Apoptosis regulation	Embelin | ESCA | BIRC6	XIAP
Embelin	HNSC	0.463091	0.00201317	BIRC6	XIAP	Apoptosis regulation	Embelin | HNSC | BIRC6	XIAP
Obatoclax Mesylate	HNSC	0.396483	0.0093369	BIRC6	BCL2,BCL-XL,BCL-W,MCL1	Apoptosis regulation	Obatoclax Mesylate | HNSC | BIRC6	BCL-2
XMD13-2	HNSC	0.46454	0.00252957	BIRC6	RIPK1	Apoptosis regulation	XMD13-2 | HNSC | BIRC6	RIPK1
PAC-1	LAML	-0.418462	0.0373588	BIRC6	Procaspase-3,Procaspase-7	Apoptosis regulation	PAC-1 | LAML | BIRC6	Procaspase
XMD13-2	LAML	-0.539145	0.00448136	BIRC6	RIPK1	Apoptosis regulation	XMD13-2 | LAML | BIRC6	RIPK1
Obatoclax Mesylate	LGG	-0.511765	0.0427234	BIRC6	BCL2,BCL-XL,BCL-W,MCL1	Apoptosis regulation	Obatoclax Mesylate | LGG | BIRC6	BCL-2
Navitoclax	LUAD	-0.274714	0.0465095	BIRC6	BCL2,BCL-XL,BCL-W	Apoptosis regulation	Navitoclax | LUAD | BIRC6	BCL-2
Sepantronium bromide	SCLC	-0.347156	0.0156284	BIRC6	BIRC5	Apoptosis regulation	Sepantronium bromide | SCLC | BIRC6	BIRC5
Sepantronium bromide	SKCM	-0.328168	0.0243225	BIRC6	BIRC5	Apoptosis regulation	Sepantronium bromide | SKCM | BIRC6	BIRC5
TW 37	SKCM	-0.371939	0.00850069	BIRC6	BCL2,BCL-XL,MCL1	Apoptosis regulation	TW 37 | SKCM | BIRC6	BCL-2
Sepantronium bromide	ALL	0.44777	0.0366426	BIRC7	BIRC5	Apoptosis regulation	Sepantronium bromide | ALL | BIRC7	BIRC5
XMD13-2	DLBC	0.424908	0.0271528	BIRC7	RIPK1	Apoptosis regulation	XMD13-2 | DLBC | BIRC7	RIPK1
Obatoclax Mesylate	GBM	-0.412681	0.0234281	BIRC7	BCL2,BCL-XL,BCL-W,MCL1	Apoptosis regulation	Obatoclax Mesylate | GBM | BIRC7	BCL-2
XMD13-2	LGG	-0.536765	0.0263119	BIRC7	RIPK1	Apoptosis regulation	XMD13-2 | LGG | BIRC7	RIPK1
Embelin	MESO	-0.502256	0.0240247	BIRC7	XIAP	Apoptosis regulation	Embelin | MESO | BIRC7	XIAP
Obatoclax Mesylate	MESO	-0.466165	0.0382905	BIRC7	BCL2,BCL-XL,BCL-W,MCL1	Apoptosis regulation	Obatoclax Mesylate | MESO | BIRC7	BCL-2
XMD13-2	MM	-0.643956	0.0129421	BIRC7	RIPK1	Apoptosis regulation	XMD13-2 | MM | BIRC7	RIPK1
TW 37	NB	-0.413846	0.0397308	BIRC7	BCL2,BCL-XL,MCL1	Apoptosis regulation	TW 37 | NB | BIRC7	BCL-2
Embelin	OV	0.486068	0.0408335	BIRC7	XIAP	Apoptosis regulation	Embelin | OV | BIRC7	XIAP
Navitoclax	OV	0.369135	0.0376051	BIRC7	BCL2,BCL-XL,BCL-W	Apoptosis regulation	Navitoclax | OV | BIRC7	BCL-2
TW 37	OV	0.576246	0.000557316	BIRC7	BCL2,BCL-XL,MCL1	Apoptosis regulation	TW 37 | OV | BIRC7	BCL-2
Embelin	SCLC	-0.276742	0.0493078	BIRC7	XIAP	Apoptosis regulation	Embelin | SCLC | BIRC7	XIAP
Obatoclax Mesylate	SCLC	-0.325426	0.0211066	BIRC7	BCL2,BCL-XL,BCL-W,MCL1	Apoptosis regulation	Obatoclax Mesylate | SCLC | BIRC7	BCL-2
TW 37	SCLC	-0.374029	0.00630442	BIRC7	BCL2,BCL-XL,MCL1	Apoptosis regulation	TW 37 | SCLC | BIRC7	BCL-2
XMD13-2	SCLC	-0.298733	0.0332228	BIRC7	RIPK1	Apoptosis regulation	XMD13-2 | SCLC | BIRC7	RIPK1
rTRAIL	SKCM	0.399556	0.00334088	BIRC7	TRAIL receptor agonist	Apoptosis regulation	rTRAIL | SKCM | BIRC7	TRAIL
